# Supplementary material for: Predicting the network of substrate-enzyme-product triads by combining compound similarity and functional domain composition
Source: Springer Nature journal article supplement (doi:10.1186/1471-2105-11-293), 2010-05-31
Supplement: 12859_2009_3750_MOESM3_ESM.pdf [file 12859_2009_3750_MOESM3_ESM.pdf]

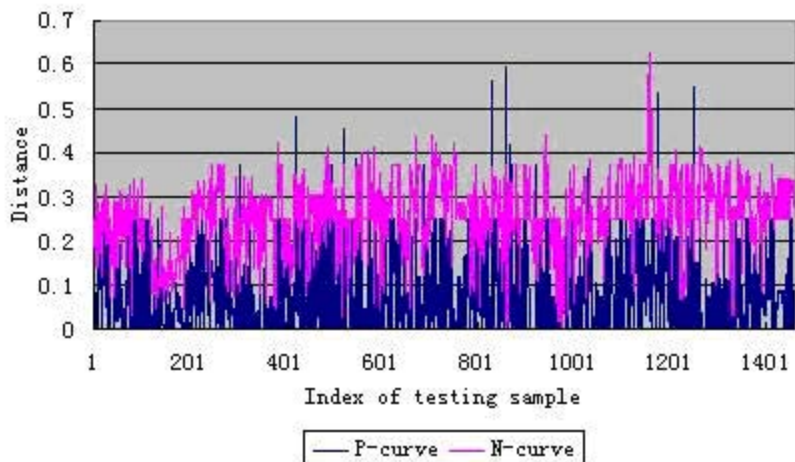

| Interval  | Frequency       |                 | Interval  | Frequency       |                 |
|-----------|-----------------|-----------------|-----------|-----------------|-----------------|
|           | Positive triads | Negative triads |           | Positive triads | Negative triads |
| 0.00~0.05 | 750             | 16              | 0.05~0.10 | 208             | 50              |
| 0.10~0.15 | 146             | 108             | 0.15~0.20 | 95              | 124             |
| 0.20~0.25 | 51              | 153             | 0.25~0.30 | 186             | 556             |
| 0.30~0.35 | 5               | 254             | 0.35~0.40 | 12              | 181             |
| 0.40~0.45 | 1               | 14              | 0.45~0.50 | 2               | 2               |
| 0.50~0.55 | 1               | 0               | 0.55~0.60 | 3               | 1               |
| 0.60~0.65 | 0               | 1               |           |                 |                 |
