# Supplementary material for: Predicting the network of substrate-enzyme-product triads by combining compound similarity and functional domain composition
Source: Springer Nature journal article supplement (doi:10.1186/1471-2105-11-293), 2010-05-31

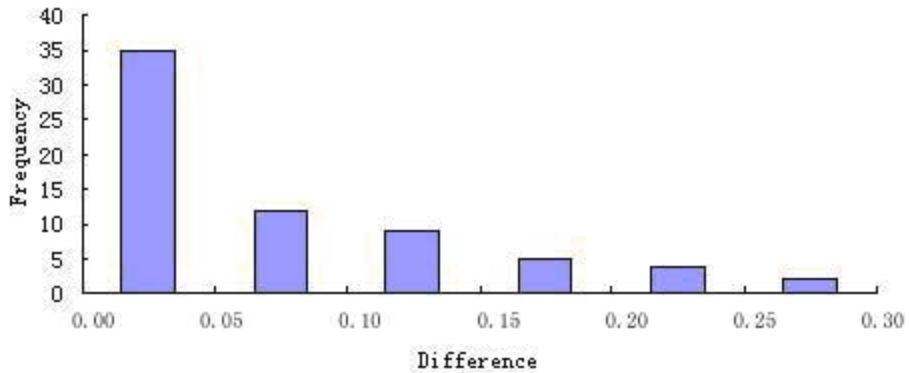

Supplement: 12859_2009_3750_MOESM4_ESM.pdf [file 12859_2009_3750_MOESM4_ESM.pdf]
